# Supplementary material for: Urban-rural disparity of overweight/obesity distribution and its potential trend with breast cancer among Chinese women
Source: PubMed Central journal article supplement (PMC5302938; doi:10.18632/oncotarget.10968), 2016-07-30
Supplement: oncotarget-07-56608-s001.pdf [file oncotarget-07-56608-s001.pdf]

## **Urban-rural disparity of overweight/obesity distribution and its potential trend with breast cancer among Chinese women**

### **Supplementary Materials**

**Supplementary Table S1: Trends between overweight/obesity and risk of breast cancer among Chinese urban and rural women according different demographic characteristics.** See [Supplementary\\_Table\\_S1](#)
